# Supplementary material
Source: Elsevier journal article supplement (https://www.sciencedirect.com/science/article/pii/S0300893224002343)
Supplement: mmc1 [file mmc1.pdf]

**SUPPLEMENTARY DATA**

**Table 1 of the supplementary data.** ICD-9 and ICD-10 codes used to define COPD and COPD exacerbation

| Code   | Defines           | Details                                                   |
|--------|-------------------|-----------------------------------------------------------|
| ICD-9  |                   |                                                           |
| 492.8  | COPD              | Other emphysema                                           |
| 493.20 | COPD              | Chronic obstructive asthma                                |
| 493.21 | COPD exacerbation | Chronic obstructive asthma with exacerbation              |
| 496    | COPD              | Chronic airway obstruction, not elsewhere classified      |
| 491.20 | COPD              | Chronic obstructive bronchitis without acute exacerbation |
| 491.22 | COPD              | Chronic obstructive bronchitis with bronchitis (acute)    |
| 491.21 | COPD exacerbation | Chronic obstructive bronchitis with acute exacerbation    |
| ICD-10 |                   |                                                           |
| J44    | COPD              | Other COPD                                                |
| J44.0  | COPD              | COPD with acute lower respiratory infection               |
| J44.1  | COPD              | COPD with (acute) exacerbation                            |
| J44.9  | COPD              | COPD, unspecified                                         |
| J44.0  | COPD exacerbation | COPD with acute lower respiratory infection               |
| J44.1  | COPD exacerbation | COPD with (acute) exacerbation                            |

COPD, chronic obstructive pulmonary disease; ICD-9, International Classification of Disease, Ninth Revision; ICD-10, International Classification of Disease, Tenth Revision.

Santos S, et al. Risk of severe cardiovascular events following COPD exacerbations: results from the EXACOS-CV study in Spain. *Rev Esp Cardiol.* 2024.

**Table 2 of the supplementary data.** ICD-9 and ICD-10 codes used to define nonfatal cardiovascular outcomes

| Code   | Defines                       | Details                                                                       |
|--------|-------------------------------|-------------------------------------------------------------------------------|
| ICD-9  |                               |                                                                               |
| 410    | Acute MI                      | Acute MI                                                                      |
| 411.1  | Unstable angina               | Intermediate coronary syndrome                                                |
| 411.8  | Unstable angina               | Other acute and subacute forms of ischemic heart disease                      |
| 413    | Angina                        | Angina pectoris                                                               |
| 428.21 | HF decompensation             | Acute systolic HF                                                             |
| 428.23 | HF decompensation             | Acute on chronic systolic HF                                                  |
| 428.31 | HF decompensation             | Acute diastolic HF                                                            |
| 428.33 | HF decompensation             | Acute on chronic diastolic HF                                                 |
| 428.41 | HF decompensation             | Acute combined systolic and diastolic HF                                      |
| 428.43 | HF decompensation             | Acute on chronic combined systolic and diastolic HF                           |
| 518.4  | HF decompensation             | Acute edema of lung, unspecified                                              |
| 514    | HF decompensation             | Pulmonary congestion and hypostasis                                           |
| 427.3  | Acute AF                      | AF                                                                            |
| 427.4  | Other ventricular dysrhythmia | Ventricular fibrillation and flutter                                          |
| 427.5  | Resuscitated cardiac arrest   | Cardiac arrest                                                                |
| 434    | Ischemic stroke and TIA       | Occlusion and stenosis of precerebral arteries                                |
| 435    | Ischemic stroke and TIA       | Occlusion of cerebral arteries                                                |
| ICD-10 |                               |                                                                               |
| I21    | Acute MI and unstable angina  | Acute MI                                                                      |
| I21.0  | Acute MI                      | STEMI                                                                         |
| I21.1  | Acute MI                      | STEMI                                                                         |
| I21.2  | Acute MI                      | STEMI                                                                         |
| I21.3  | Acute MI                      | Non-STEMI                                                                     |
| I21.4  | Acute MI                      | Non-STEMI                                                                     |
| I21.9  | Acute MI                      | Non-STEMI                                                                     |
| I20.0  | Acute MI and unstable angina  | Unstable angina pectoris                                                      |
| I50.21 | HF decompensation             | Acute systolic (congestive) HF                                                |
| I50.23 | HF decompensation             | Acute on chronic systolic (congestive) HF                                     |
| I50.31 | HF decompensation             | Acute diastolic (congestive) HF                                               |
| I50.33 | HF decompensation             | Acute on chronic diastolic (congestive) HF                                    |
| I50.41 | HF decompensation             | Acute combined systolic (congestive) and diastolic (congestive) HF            |
| I50.43 | HF decompensation             | Acute on chronic combined systolic (congestive) and diastolic (congestive) HF |
| J81    | HF decompensation             | Pulmonary edema                                                               |
| I48    | Acute AF                      | AF and flutter                                                                |

Santos S, et al. Risk of severe cardiovascular events following COPD exacerbations: results from the EXACOS-CV study in Spain. *Rev Esp Cardiol.* 2024.

|     |                             |                                                 |
|-----|-----------------------------|-------------------------------------------------|
| I49 | Other cardiac arrhythmias   | Other cardiac arrhythmias                       |
| I46 | Resuscitated cardiac arrest | Cardiac arrest                                  |
| I63 | Ischemic stroke and TIA     | Cerebral infarction, unspecified                |
| G45 | Ischemic stroke and TIA     | Transient cerebral ischemic attack, unspecified |

AF, atrial fibrillation; HF, heart failure; ICD-9, International Classification of Disease, Ninth Revision; ICD-10, International Classification of Disease, 10th Revision; MI, myocardial infarction; STEMI, ST-segment elevation myocardial infarction; TIA, transient ischemic attack.

**Table 3 of the supplementary data.** Incident cohort - demographics and baseline characteristics

|                                                                                        | All patients     | No exacerbation during follow-up <sup>a</sup> | ≥ 1 exacerbation during total follow-up |
|----------------------------------------------------------------------------------------|------------------|-----------------------------------------------|-----------------------------------------|
|                                                                                        | N = 12 713       | n = 3488                                      | n = 9225                                |
| <b>Sociodemographic characteristics</b>                                                |                  |                                               |                                         |
| <i>Age, y</i>                                                                          |                  |                                               |                                         |
| Mean                                                                                   | 62.9 ± 10.7      | 61.5 ± 4.6                                    | 63.3 ± 12.2                             |
| Median                                                                                 | 62.2 [54.3–70.9] | 62.3 [58.3–65.4]                              | 61.9 [52.3–73.9]                        |
| <i>Sex (female)</i>                                                                    | 2740 (21.6)      | 768 (22)                                      | 1972 (21.6)                             |
| <b>Behavioural risk factors</b>                                                        |                  |                                               |                                         |
| <i>Tobacco use</i>                                                                     |                  |                                               |                                         |
| Smoker                                                                                 | 4545 (35.8)      | 2210 (63.4)                                   | 2335 (25.6)                             |
| Exsmoker                                                                               | 5943 (46.7)      | 646 (18.5)                                    | 5297 (58)                               |
| Never smoker                                                                           | 2225 (17.5)      | 632 (18.1)                                    | 1593 (17.4)                             |
| <i>Alcohol use disorder</i>                                                            | 586 (4.6)        | 227 (6.5)                                     | 359 (3.9)                               |
| <b>Associated comorbidities</b>                                                        |                  |                                               |                                         |
| <i>Obesity</i>                                                                         | 2249 (17.7)      | 838 (24.0)                                    | 1411 (15.4)                             |
| <i>Diabetes mellitus type 2</i>                                                        | 1990 (15.7)      | 399 (11.4)                                    | 1591 (17.4)                             |
| <i>Disorders of lipoprotein metabolism</i>                                             | 6802 (53.5)      | 2440 (70.0)                                   | 4362 (47.8)                             |
| <i>Ischemic heart disease</i>                                                          | 2086 (16.4)      | 446 (12.8)                                    | 1640 (18.0)                             |
| <i>Hypertensive diseases</i>                                                           | 7344 (57.8)      | 1840 (52.8)                                   | 5504 (60.3)                             |
| <i>HF and pulmonary oedema</i>                                                         | 2564 (20.2)      | 539 (15.5)                                    | 2025 (22.2)                             |
| <i>Pulmonary hypertension</i>                                                          | 402 (3.2)        | 69 (2.0)                                      | 333 (3.6)                               |
| <i>Venous thromboembolism</i>                                                          | 901 (7.1)        | 165 (4.7)                                     | 736 (8.1)                               |
| <i>Cerebrovascular disease</i>                                                         | 1146 (9.0)       | 212 (6.1)                                     | 934 (10.2)                              |
| <i>Arrhythmia</i>                                                                      | 1320 (10.4)      | 266 (7.6)                                     | 1054 (11.5)                             |
| <i>Current asthma</i>                                                                  | 1197 (9.4)       | 249 (7.1)                                     | 948 (10.4)                              |
| <i>Chronic kidney disease, renal failure</i>                                           | 1255 (9.9)       | 225 (6.5)                                     | 1030 (11.3)                             |
| <i>Severe mental illness</i>                                                           | 1770 (13.9)      | 330 (9.5)                                     | 1440 (15.8)                             |
| <i>Anxiety disorder</i>                                                                | 4604 (36.2)      | 1127 (32.3)                                   | 3477 (38.1)                             |
| <b>Number of primary care physician visits in the 12 months preceding cohort entry</b> |                  |                                               |                                         |
| <i>Mean</i>                                                                            | 6 ± 3            | 3.8 ± 2.2                                     | 6.9 ± 2.9                               |
| <i>Median</i>                                                                          | 6 [4–8]          | 4 [2–5]                                       | 7 [5–9]                                 |
| <b>Medication use<sup>b</sup></b>                                                      |                  |                                               |                                         |
| <i>Long-acting inhaled COPD drug use</i>                                               |                  |                                               |                                         |
| ICS                                                                                    | 7421 (58.4)      | 1937 (55.5)                                   | 5484 (60.0)                             |
| LABA                                                                                   | 8252 (64.9)      | 2193 (62.9)                                   | 6059 (66.3)                             |
| LAMA                                                                                   | 5411 (42.6)      | 1408 (40.4)                                   | 4003 (43.8)                             |
| <i>Short-acting inhaler</i>                                                            |                  |                                               |                                         |
| SABA                                                                                   | 12 012 (94.5)    | 3151 (90.3)                                   | 8861 (97.0)                             |
| SAMA                                                                                   | 1328 (10.4)      | 343 (9.8)                                     | 985 (10.8)                              |
| <i>Roflumilast</i>                                                                     | 228 (1.8)        | 49 (1.4)                                      | 179 (2.0)                               |

Santos S, et al. Risk of severe cardiovascular events following COPD exacerbations: results from the EXACOS-CV study in Spain. *Rev Esp Cardiol.* 2024.

|                           |               |             |             |
|---------------------------|---------------|-------------|-------------|
| <i>Any cardiac drug</i>   | 11 546 (90.8) | 3104 (89)   | 8442 (92.4) |
| <i>Any metabolic drug</i> | 7886 (62.0)   | 2060 (59.1) | 5826 (63.8) |

COPD, chronic obstructive pulmonary disease; HF, heart failure; ICS, inhaled corticosteroid; IQR, interquartile range; LABA, long-acting  $\beta_2$ -agonist; LAMA, long-acting muscarinic antagonist; SABA, short-acting  $\beta_2$ -agonist; SAMA, short-acting muscarinic antagonist; SD, standard deviation.

Data are expressed as No. (%), mean  $\pm$  standard deviation or median [interquartile range].

<sup>a</sup>Total follow-up was defined as time from cohort entry to earliest of 31 December 2019, loss to follow-up or onset of the first severe acute cardiovascular event of interest of any type, including all-cause death.

<sup>b</sup>Medication use was defined as the dispensation of a medication of each class (which could be part of a fixed combination), at least once in the 12 months before the cohort entry date.

Santos S, et al. Risk of severe cardiovascular events following COPD exacerbations: results from the EXACOS-CV study in Spain. Rev Esp Cardiol. 2024.

**Table 4 of the supplementary data.** Crude IR of a first severe cardiovascular event (nonfatal event or all-cause death) within unexposed time and exposed time following moderate/severe exacerbation onset

| Exposure to a moderate/severe exacerbation     | Patients*                       | First events | PY of follow-up | Crude IR (95%CI) per 100 PY |                     |
|------------------------------------------------|---------------------------------|--------------|-----------------|-----------------------------|---------------------|
| <b>Nonfatal cardiovascular event</b>           |                                 |              |                 |                             |                     |
| <i>Prior to first exacerbation (reference)</i> | 21 900                          | 2922         | 55 204          | 5.29 (5.11-5.48)            |                     |
| 1-7 d                                          | } Time since exacerbation onset | 14 997       | 392             | 1046                        | 37.47 (34.59-40.44) |
| 8-14 d                                         |                                 | 14 725       | 189             | 1039                        | 19.73 (17.42-22.26) |
| 15-30 d                                        |                                 | 14 417       | 296             | 2346                        | 11.94 (10.69-13.31) |
| 31-180 d                                       |                                 | 13 718       | 1146            | 14 124                      | 8.11 (7.67-8.58)    |
| 181-365 d                                      |                                 | 9780         | 521             | 8143                        | 6.40 (5.89-6.95)    |
| > 365 d                                        |                                 | 7917         | 444             | 6753                        | 6.57 (6.01-7.19)    |
| <b>ACS</b>                                     |                                 |              |                 |                             |                     |
| <i>Prior to first exacerbation (reference)</i> | 21 900                          | 585          | 58 111          | 1.01 (0.93-1.09)            |                     |
| 1-7 d                                          | } Time since exacerbation onset | 17 952       | 83              | 1567                        | 5.30 (4.29-6.52)    |
| 8-14 d                                         |                                 | 17 879       | 41              | 1550                        | 2.65 (1.96-3.57)    |
| 15-30 d                                        |                                 | 17 823       | 69              | 3495                        | 1.97 (1.56-2.49)    |
| 31-180 d                                       |                                 | 17 648       | 265             | 21 449                      | 1.24 (1.10-1.39)    |
| 181-365 d                                      |                                 | 13 806       | 155             | 12 600                      | 1.23 (1.05-1.44)    |
| > 365 d                                        |                                 | 12 961       | 98              | 9301                        | 1.05 (0.87-1.28)    |
| <b>HF decompensation</b>                       |                                 |              |                 |                             |                     |
| <i>Prior to first exacerbation (reference)</i> | 21 900                          | 1479         | 57 927          | 2.55 (2.43-2.68)            |                     |
| 1-7 d                                          | } Time since exacerbation onset | 17 050       | 181             | 1416                        | 12.78 (11.14-14.62) |
| 8-14 d                                         |                                 | 16 938       | 101             | 1402                        | 7.21 (5.97-8.68)    |
| 15-30 d                                        |                                 | 16 863       | 158             | 3161                        | 5.00 (4.29-5.81)    |
| 31-180 d                                       |                                 | 16 461       | 582             | 19 313                      | 3.01 (2.78-3.26)    |
| 181-365 d                                      |                                 | 12 673       | 291             | 11 310                      | 2.57 (2.30-2.88)    |
| > 365 d                                        |                                 | 11 920       | 180             | 8369                        | 2.15 (1.86-2.48)    |
| <b>Cerebral ischemia</b>                       |                                 |              |                 |                             |                     |
| <i>Prior to first exacerbation (reference)</i> | 21 900                          | 311          | 58 170          | 0.53 (0.48-0.60)            |                     |
| 1-7 d                                          | } Time since exacerbation onset | 18 206       | 57              | 1618                        | 3.52 (2.73-4.54)    |
| 8-14 d                                         |                                 | 18 171       | 22              | 1600                        | 1.38 (0.91-2.07)    |
| 15-30 d                                        |                                 | 18 145       | 27              | 3608                        | 0.75 (0.51-1.09)    |
| 31-180 d                                       |                                 | 18 055       | 120             | 22 191                      | 0.54 (0.45-0.65)    |
| 181-365 d                                      |                                 | 14 248       | 76              | 13 051                      | 0.58 (0.47-0.73)    |
| > 365 d                                        |                                 | 13 372       | 40              | 9616                        | 0.42 (0.31-0.57)    |
| <b>Arrhythmia</b>                              |                                 |              |                 |                             |                     |
| <i>Prior to first exacerbation (reference)</i> | 21 900                          | 898          | 58 045          | 1.55 (1.45-1.65)            |                     |
| 1-7 d                                          |                                 | 17 626       | 112             | 1511                        | 7.41 (6.20-8.84)    |
| 8-14 d                                         |                                 | 17 538       | 40              | 1495                        | 2.68 (1.97-3.62)    |
| 15-30 d                                        |                                 | 17 495       | 66              | 3372                        | 1.96 (1.54-2.48)    |
| 31-180 d                                       |                                 | 17 152       | 375             | 20 642                      | 1.82 (1.64-2.01)    |

Santos S, et al. Risk of severe cardiovascular events following COPD exacerbations: results from the EXACOS-CV study in Spain. *Rev Esp Cardiol.* 2024.

|                                                |                                 |        |      |        |                     |
|------------------------------------------------|---------------------------------|--------|------|--------|---------------------|
| 181-365 d                                      | } Time since exacerbation onset | 13 414 | 211  | 12 102 | 1.74 (1.53-1.99)    |
| > 365 d                                        |                                 | 12 652 | 145  | 8827   | 1.64 (1.40-1.93)    |
| <b>All-cause death</b>                         |                                 |        |      |        |                     |
| <i>Prior to first exacerbation (reference)</i> |                                 | 21 900 | 876  | 57 129 | 1.53 (1.44-1.64)    |
| 1-7 d                                          | } Time since exacerbation onset | 18 241 | 757  | 1625   | 46.57 (44.16-49.00) |
| 8-14 d                                         |                                 | 18 208 | 366  | 1634   | 22.40 (20.44-24.48) |
| 15-30 d                                        |                                 | 18 191 | 396  | 3667   | 10.80 (9.83-11.84)  |
| 31-180 d                                       |                                 | 18 116 | 1108 | 22 506 | 4.92 (4.65-5.21)    |
| 181-365 d                                      |                                 | 14 296 | 306  | 13 188 | 2.32 (2.08-2.59)    |
| > 365 d                                        |                                 | 11 847 | 225  | 10 693 | 2.10 (1.85-2.39)    |

95%CI, 95% confidence interval; ACS, acute coronary syndrome; HF, heart failure; IR, incidence rate;

PY, patient-years.

Shaded time periods (including time prior to first exacerbation and all follow-up time of never exacerbating patients) were considered unexposed to exacerbations.

\* Number of patients contributing at least 1 day of data in this period from the overall population of 24 393 patients.

Santos S, et al. Risk of severe cardiovascular events following COPD exacerbations: results from the EXACOS-CV study in Spain. *Rev Esp Cardiol.* 2024.

**Table 5 of the supplementary data.** Unadjusted HR (95%CI) for time to a first severe cardiovascular event (any event [nonfatal event or all-cause death] and by event type) within exposed time periods following a moderate/severe exacerbation vs unexposed time (univariable model)

| Exposure to a moderate/severe exacerbation                          |                                 | Unadjusted HR (95%CI) for time to first severe cardiovascular event |
|---------------------------------------------------------------------|---------------------------------|---------------------------------------------------------------------|
| <b>Cardiovascular event of any type (including all-cause death)</b> |                                 |                                                                     |
| <i>Prior to first exacerbation (reference)</i>                      |                                 | 1                                                                   |
| 1-7 d                                                               | } Time since exacerbation onset | 10.27 (9.46-11.16)                                                  |
| 8-14 d                                                              |                                 | 8.39 (7.67-9.18)                                                    |
| 15-30 d                                                             |                                 | 4.45 (4.10-4.84)                                                    |
| 31-180 d                                                            |                                 | 2.43 (2.30-2.58)                                                    |
| 181-365 d                                                           |                                 | 1.80 (1.65-1.97)                                                    |
| > 365 d                                                             |                                 | 1.61 (1.45-1.78)                                                    |
| <b>Nonfatal cardiovascular event (death as a censoring event)</b>   |                                 |                                                                     |
| <i>Prior to first exacerbation (reference)</i>                      |                                 | 1                                                                   |
| 1-7 d                                                               | } Time since exacerbation onset | 8.70 (7.82-9.68)                                                    |
| 8-14 d                                                              |                                 | 4.62 (4.01-5.33)                                                    |
| 15-30 d                                                             |                                 | 2.82 (2.49-3.19)                                                    |
| 31-180 d                                                            |                                 | 2.33 (2.17-2.50)                                                    |
| 181-365 d                                                           |                                 | 2.66 (2.42-2.93)                                                    |
| > 365 d                                                             |                                 | 2.60 (2.35-2.89)                                                    |
| <b>ACS</b>                                                          |                                 |                                                                     |
| <i>Prior to first exacerbation (reference)</i>                      |                                 | 1                                                                   |
| 1-7 d                                                               | } Time since exacerbation onset | 6.27 (4.96-7.93)                                                    |
| 8-14 d                                                              |                                 | 3.10 (2.25-4.27)                                                    |
| 15-30 d                                                             |                                 | 2.33 (1.81-3.01)                                                    |
| 31-180 d                                                            |                                 | 1.69 (1.44-1.97)                                                    |
| 181-365 d                                                           |                                 | 2.19 (1.81-2.66)                                                    |
| > 365 d                                                             |                                 | 2.09 (1.73-2.53)                                                    |
| <b>HF decompensation</b>                                            |                                 |                                                                     |
| <i>Prior to first exacerbation (reference)</i>                      |                                 | 1                                                                   |
| 1-7 d                                                               | } Time since exacerbation onset | 6.57 (5.62-7.69)                                                    |
| 8-14 d                                                              |                                 | 3.62 (2.95-4.43)                                                    |
| 15-30 d                                                             |                                 | 2.61 (2.21-3.08)                                                    |
| 31-180 d                                                            |                                 | 1.83 (1.65-2.02)                                                    |
| 181-365 d                                                           |                                 | 2.14 (1.87-2.44)                                                    |
| > 365 d                                                             |                                 | 1.95 (1.71-2.23)                                                    |
| <b>Cerebral ischemia</b>                                            |                                 |                                                                     |
| <i>Prior to first exacerbation (reference)</i>                      |                                 | 1                                                                   |
| 1-7 d                                                               |                                 | 7.53 (5.64-10.06)                                                   |
| 8-14 d                                                              |                                 | 2.91 (1.88-4.50)                                                    |
| 15-30 d                                                             |                                 | 1.60 (1.08-2.39)                                                    |
| 31-180 d                                                            |                                 | 1.34 (1.07-1.67)                                                    |



Santos S, et al. Risk of severe cardiovascular events following COPD exacerbations: results from the EXACOS-CV study in Spain. *Rev Esp Cardiol.* 2024.

|                                                |                                 |                     |
|------------------------------------------------|---------------------------------|---------------------|
| 181-365 d                                      | } Time since exacerbation onset | 1.88 (1.43-2.46)    |
| > 365 d                                        |                                 | 1.44 (1.10-1.89)    |
| <b>Arrhythmia</b>                              |                                 |                     |
| <i>Prior to first exacerbation (reference)</i> |                                 | 1                   |
| 1-7 d                                          | } Time since exacerbation onset | 5.57 (4.56-6.80)    |
| 8-14 d                                         |                                 | 1.95 (1.60-2.39)    |
| 15-30 d                                        |                                 | 1.42 (1.17-1.74)    |
| 31-180 d                                       |                                 | 1.63 (1.34-2.00)    |
| 181-365 d                                      |                                 | 2.03 (1.73-2.39)    |
| > 365 d                                        |                                 | 2.07 (1.76-2.43)    |
| <b>All-cause death</b>                         |                                 |                     |
| <i>Prior to first exacerbation (reference)</i> |                                 | 1                   |
| 1-7 d                                          | } Time since exacerbation onset | 21.58 (19.50-23.88) |
| 8-14 d                                         |                                 | 10.31 (9.09-11.68)  |
| 15-30 d                                        |                                 | 4.94 (4.38-5.59)    |
| 31-180 d                                       |                                 | 2.14 (1.95-2.35)    |
| 181-365 d                                      |                                 | 0.96 (0.83-1.09)    |
| > 365 d                                        |                                 | 0.96 (0.82-1.12)    |

95%CI, 95% confidence interval; ACS, acute coronary syndrome; HF, heart failure; HR, hazard ratio.

Shaded time periods (including time prior to first exacerbation and all follow-up time of never exacerbating patients) were considered unexposed to exacerbations.

**Figure 1 of the supplementary data.** Definition of exposure and nonexposure

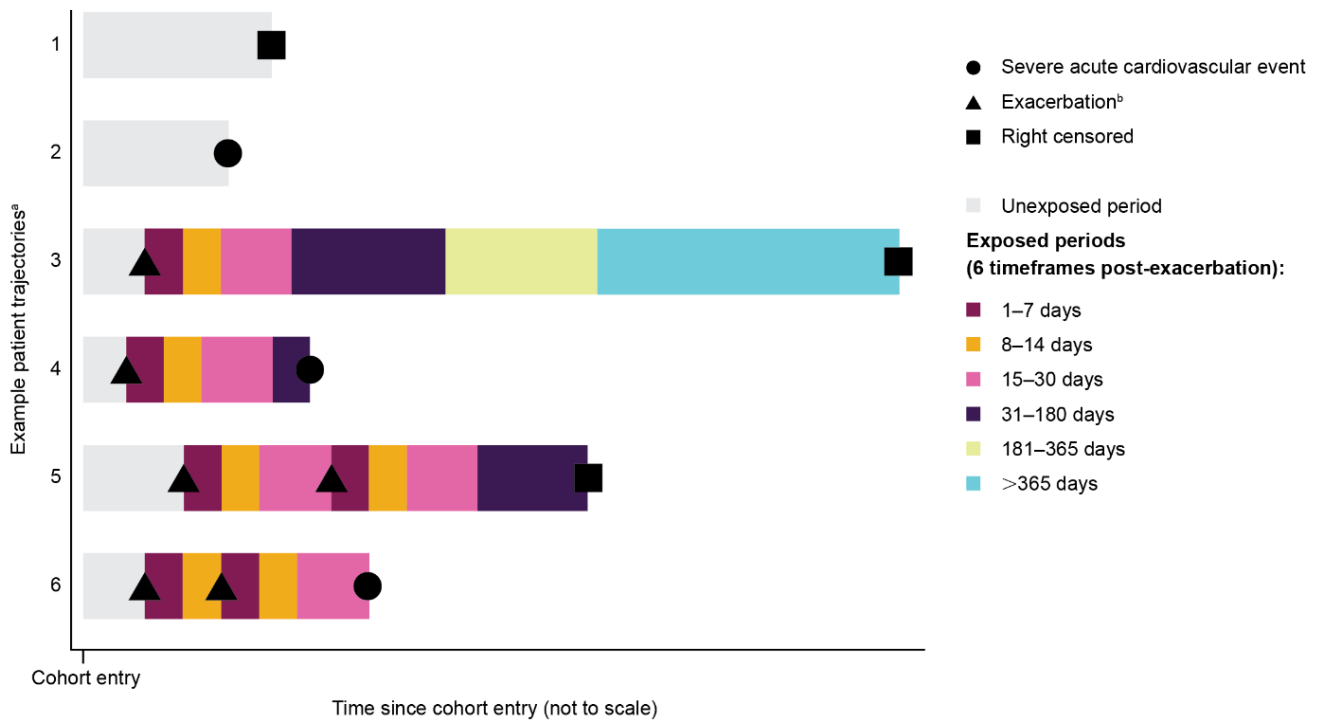

<sup>a</sup> Multiple exacerbations can occur within trajectory profiles 5 and 6; on the examples shown, there are two exacerbations.

<sup>b</sup> A moderate or severe exacerbation indicates the beginning of the exposure window.

**Figure 2 of the supplementary data.** Baseline covariate balance plot (Love plot) comparison of patients who ever and never exacerbated during follow-up

Santos S, et al. Risk of severe cardiovascular events following COPD exacerbations: results from the EXACOS-CV study in Spain. *Rev Esp Cardiol.* 2024.

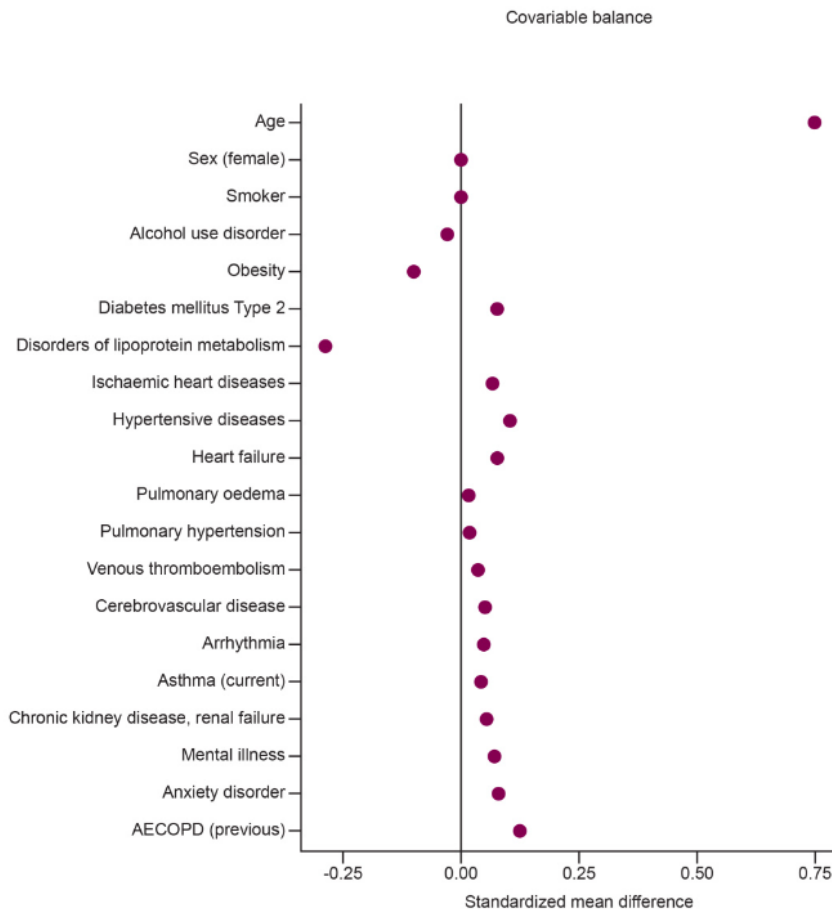

The x-axis (standardized mean differences) expresses the extent to which each of the items analyzed is more represented in one cohort or the other. The further to the right of the central axis (0.00), the greater the presence of each of the items analyzed.

AECOPD, acute exacerbation of chronic obstructive pulmonary disease (includes moderate and severe exacerbations: moderate exacerbations were defined as those requiring an outpatient visit with a diagnosis code for COPD [see table 1 of the supplementary data] and dispensation of oral corticosteroids and/or antibiotics within 5 days following the visit and for a maximum of 15 days; severe exacerbations were defined as those requiring an emergency department visit or a hospitalization of  $\geq 1$  night with a discharge diagnosis code for COPD exacerbation [see table 1 of the supplementary data]).
